# Supplementary material for: Verrucomicrobia are prevalent in north-temperate freshwater lakes and display class-level preferences between lake habitats
Source: PubMed Central journal article supplement (PMC5874073; doi:10.1371/journal.pone.0195112), 2018-03-28
Supplement: pone.0195112.s003.pdf [file pone.0195112.s003.pdf]

1 **S2 Fig. Whole bacterial community phylum-level relative abundance.** Samples are  
 2 categorized by lake type (horizontal), fraction (vertical), and season (vertical). Error bars  
 3 represent the interquartile range.

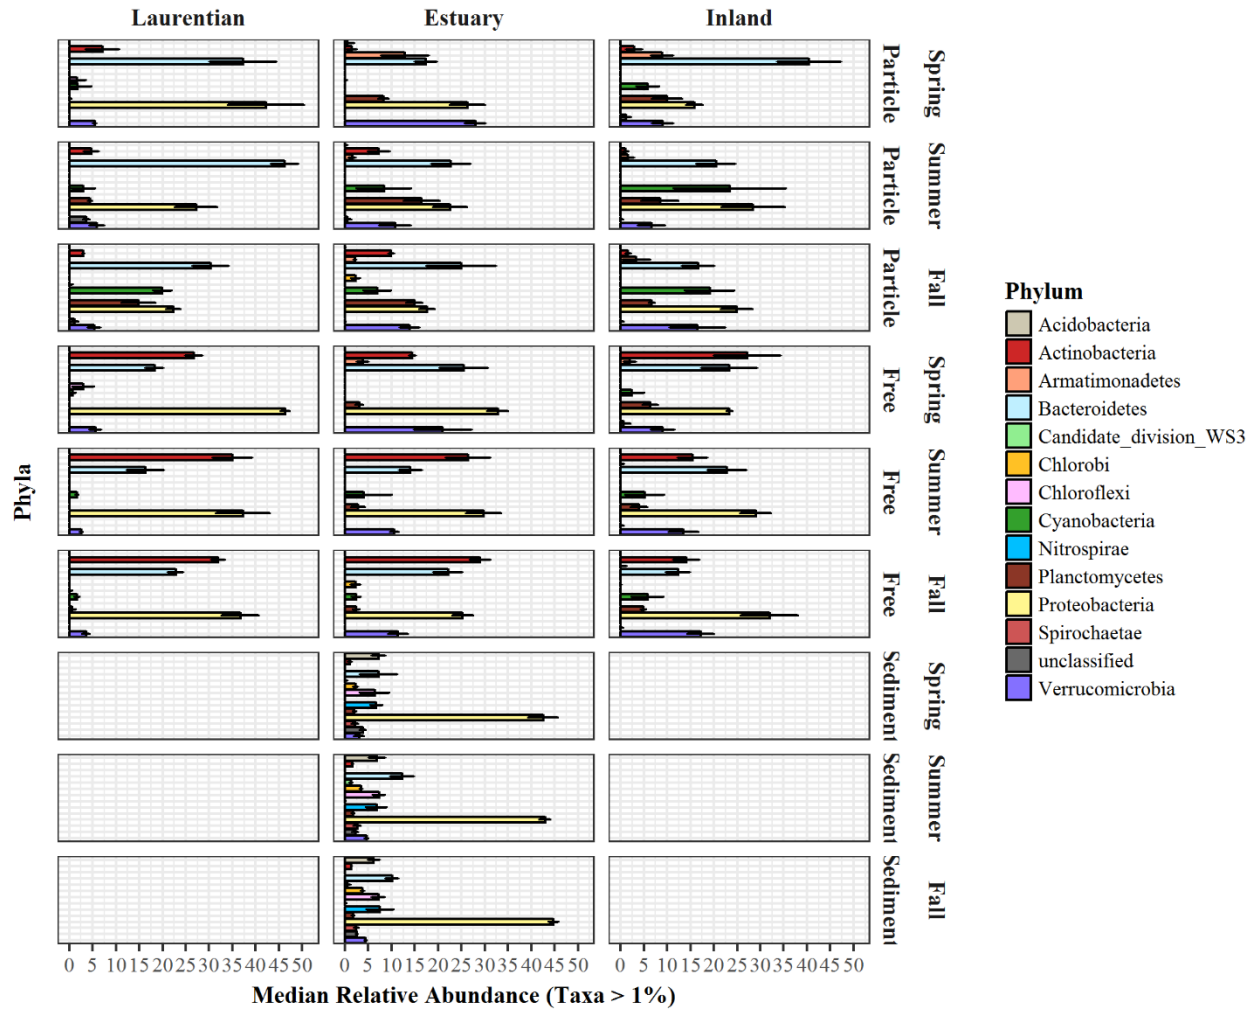

4

5
