# Supplementary material for: Verrucomicrobia are prevalent in north-temperate freshwater lakes and display class-level preferences between lake habitats
Source: PubMed Central journal article supplement (PMC5874073; doi:10.1371/journal.pone.0195112), 2018-03-28
Supplement: pone.0195112.s004.pdf [file pone.0195112.s004.pdf]

- 1 **S3 Fig. Multiple linear model residual plots.** Residual plots for the best multiple linear model
- 2 for (A) Laurentian, (B) estuary, and (C) inland samples.

**A**

Laurentian

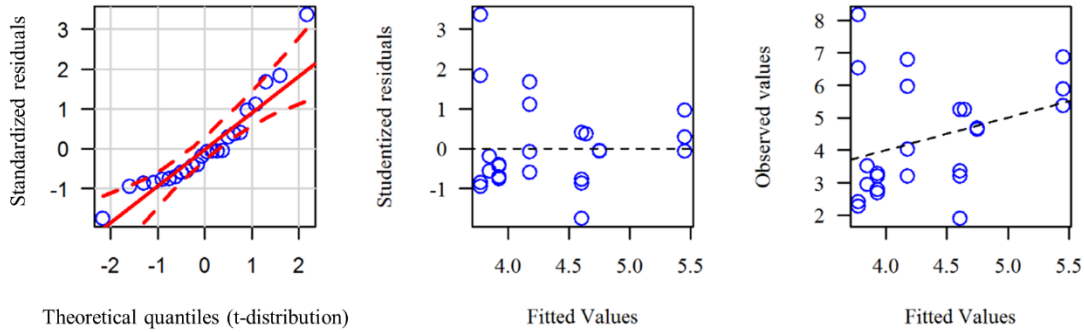

**B**

Estuary

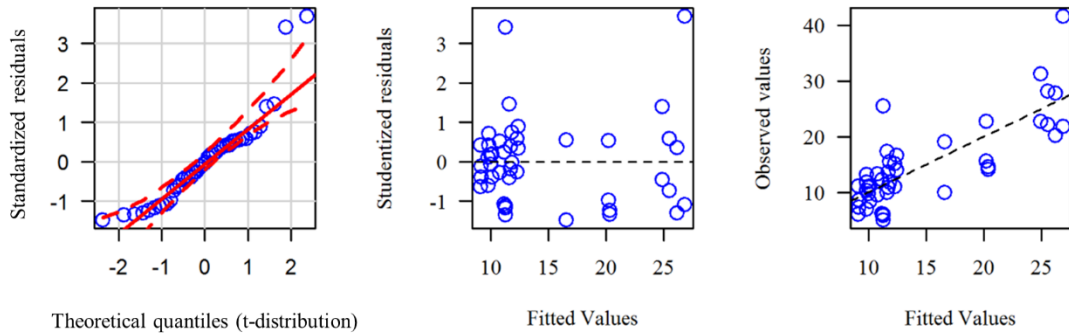

**C**

Inland

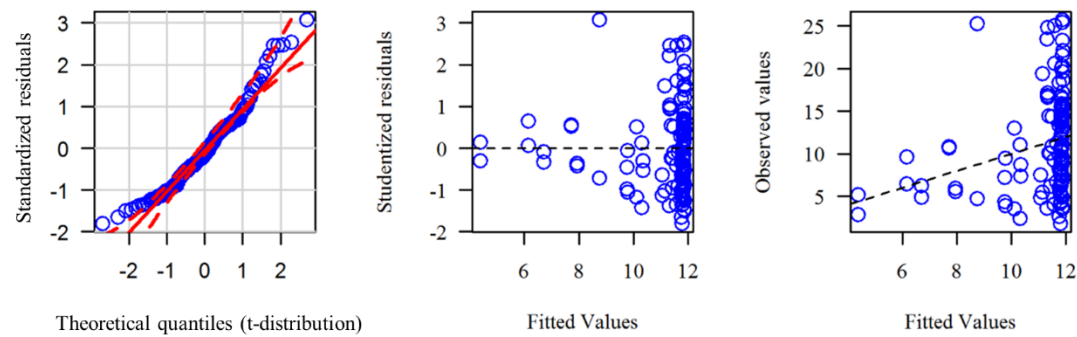

3

4
