# Supplementary material for: Verrucomicrobia are prevalent in north-temperate freshwater lakes and display class-level preferences between lake habitats
Source: PLOS journal article supplement (doi:10.1371/journal.pone.0195112), 2018-03-28
Supplement: S1 (10.1371/journal.pone.0195112.s001) [file journal.pone.0195112.s001]

## Supporting Information

**S1 Table. Limnological data for samples included in the linear modelling and bioenv analyses.** Table is organized by A) Laurentian survey samples, B) estuary survey samples, C) inland lake survey samples.

BGA = blue-green algae, Chl *a* = Chlorophyll *a*, DO = dissolved oxygen, DOC = dissolved organic carbon, NH<sub>3</sub> = ammonia, NH<sub>4</sub> = ammonium, NO<sub>3</sub> = nitrate, ORP = oxidation-reduction potential, PAR = photosynthetically active radiation, POC = particulate organic carbon, PON = particulate organic nitrogen, PP = particulate phosphorus, SiO<sub>2</sub> = silica, SO<sub>4</sub> = sulfate, SRP = soluble reactive phosphorus, TDP = total dissolved phosphorus, TKN = total Kjeldahl nitrogen, TP = total phosphorus, TSS = total suspended solids

A) Laurentian Survey Samples

| Station   | GPS coordinates north | GPS coordinates west | Depth   | Sample Size | Sample Depth (m) | Temperature (°C) | DO (mg/L) | Chl (ug/L) | TP (ug/L) | PP (ug/L) | TDP (ug/L) | POC (mg/L) | PON (mg/L) | DOC (mg/L) | SiO <sub>2</sub> (mg/L) | TSS (mg/L) | Fluorescence (mg/m <sup>3</sup> ) | PAR     |
|-----------|-----------------------|----------------------|---------|-------------|------------------|------------------|-----------|------------|-----------|-----------|------------|------------|------------|------------|-------------------------|------------|-----------------------------------|---------|
| Nearshore | 43.18806              | 86.34389             | Surface | 11          | 5                | 12.36            | 12.38     | 2.00       | 11.23     | 8.57      | 2.66       | 0.39       | 0.05       | 3.98       | 1.63                    | 2.59       | 1.37                              | 247.89  |
| Offshore  | 43.19972              | 86.56972             | Surface | 10          | 5                | 13.21            | 11.27     | 0.92       | 4.35      | 2.46      | 1.89       | 0.20       | 0.03       | 2.32       | 1.46                    | 0.39       | 0.44                              | 32.15   |
|           |                       |                      | Bottom  | 3           | 105              | 4.27             | 13.78     | 0.19       | 2.70      | 1.06      | 1.64       | 0.07       | 0.01       | 1.94       | 1.91                    | 0.10       | 0.07                              | 0.00    |
| Buoy      | 43.240965             | 86.278965            | Surface | 9           | 1.5              | 23.303           | 8.63857   | NA         | NA        | NA        | NA         | NA         | NA         | NA         | NA                      | NA         | 14.23325                          | 522.648 |
|           |                       |                      | Bottom  | 6           | 9.2              | 17.317           | 0         | NA         | NA        | NA        | NA         | NA         | NA         | NA         | NA                      | NA         | 13.11175                          | 0.02155 |

B) Estuary Survey Samples

| Station | GPS coordinates north | GPS coordinates west | Depth   | Sample Size | Sample Depth (m) | Temperature (°C) | TDS (mg/L) | pH   | ORP (mV) | Chl (ug/L) | BGA (cells/mL) | CI (mg/L) | SO <sub>4</sub> (mg/L) | NO <sub>3</sub> (mg/L) | NH <sub>3</sub> (mg/L) | TKN (mg/L) | SRP (ug/L) | TP (ug/L) | Alb (mg/L) | DO (mg/L) | Turbidity (NTU) |
|---------|-----------------------|----------------------|---------|-------------|------------------|------------------|------------|------|----------|------------|----------------|-----------|------------------------|------------------------|------------------------|------------|------------|-----------|------------|-----------|-----------------|
| Inlet   | 43.25208              | 86.25242             | Surface | 6           | 1                | 16.76            | 265.00     | 8.14 | 404.67   | 4.35       | 4024.33        | 20.67     | 15.00                  | 0.80                   | 0.02                   | 0.53       | 2.50       | 21.27     | 141.33     | 9.22      | 5.49            |
|         |                       |                      | Bottom  | 6           | 6.82             | 19.46            | 266.33     | 8.09 | 404.33   | 2.23       | 2159.33        | 21.33     | 15.33                  | 0.79                   | 0.02                   | 0.48       | 2.50       | 24.57     | 147.67     | 8.69      | 6.13            |
| Bear    | 43.2386               | 86.29917             | Surface | 4           | 1                | 20.46            | 246.00     | 8.17 | 404.00   | 2.94       | 3882.50        | 24.50     | 16.00                  | 0.79                   | 0.04                   | 0.55       | 2.50       | 20.35     | 151.00     | 9.31      | 3.55            |
|         |                       |                      | Bottom  | 4           | 15.61            | 11.34            | 216.00     | 7.39 | 354.00   | 0.29       | 1478.50        | 23.50     | 19.50                  | 0.85                   | 0.08                   | 0.30       | 2.50       | 19.25     | 135.00     | 6.45      | 4.30            |
| Outlet  | 43.25297              | 86.32684             | Surface | 6           | 1                | 18.80            | 222.33     | 8.03 | 409.00   | 2.75       | 9001.33        | 23.33     | 14.67                  | 0.71                   | 0.02                   | 0.54       | 2.50       | 20.20     | 139.33     | 9.28      | 3.78            |
|         |                       |                      | Bottom  | 6           | 9.57             | 17.19            | 223.00     | 7.80 | 412.00   | 0.96       | 1298.33        | 23.00     | 14.67                  | 0.51                   | 0.04                   | 0.59       | 4.00       | 18.53     | 136.00     | 7.79      | 2.77            |
| Deep    | 43.22306              | 86.29809             | Surface | 6           | 1                | 18.69            | 224.33     | 7.99 | 421.00   | 2.52       | 58089.33       | 22.00     | 14.67                  | 0.75                   | 0.02                   | 0.63       | 2.50       | 18.27     | 137.33     | 9.31      | 3.57            |
|         |                       |                      | Bottom  | 6           | 22.87            | 12.36            | 203.00     | 7.44 | 360.33   | 0.54       | 1220.67        | 18.67     | 16.67                  | 0.81                   | 0.03                   | 0.46       | 13.73      | 34.27     | 125.67     | 5.66      | 0.80            |

C) Inland Lake Survey Samples

|              | Cedar | GPS coordinates north | GPS coordinates west | Total Depth (ft) | Depth   | Sample Size | Sample Depth (m) | Chl (ug/L) | NO <sub>3</sub> (mg/L) | SRP (ug/L) | TP (ug/L) | TDP (ug/L) | NH <sub>4</sub> (ug/L) |
|--------------|-------|-----------------------|----------------------|------------------|---------|-------------|------------------|------------|------------------------|------------|-----------|------------|------------------------|
| Big Seven    |       | 42.81163              | 83.67762             | 51.5             | Surface | 6           | 2                | 4.64       | 0.16                   | 0.14       | 17.26     | 4.47       | 15.46                  |
|              |       |                       |                      |                  | Bottom  | 2           | 13               | 5.28       | 0.16                   | 17.01      | 48.19     | 17.29      | 730.43                 |
| Bishop       |       | 42.50139              | 83.83851             | 56.0             | Surface | 6           | 2                | 4.64       | 0.17                   | 14.05      | 14.88     | 4.39       | 9.72                   |
|              |       |                       |                      |                  | Bottom  | 2           | 14               | 7.63       | 0.16                   | 19.23      | 60.16     | 16.70      | 1056.53                |
| Bruin        |       | 42.41941              | 84.03976             | 49.8             | Surface | 10          | 2                | 1.81       | 0.15                   | 4.43       | 8.19      | 3.53       | 40.20                  |
|              |       |                       |                      |                  | Bottom  | 6           | 11.8             | 2.90       | 0.14                   | 9.41       | 12.44     | 3.59       | 440.43                 |
| Cedar        |       | 42.31501              | 84.08047             | 24.6             | Surface | 6           | 2                | 3.81       | 0.17                   | 0.64       | 13.72     | 4.81       | 80.46                  |
|              |       |                       |                      |                  | Bottom  | 2           | 5                | 4.95       | 0.17                   | 8.38       | 18.94     | 5.13       | 216.38                 |
| Halfmoon     |       | 42.42014              | 84.01286             | 88.0             | Surface | 6           | 2                | 7.84       | 0.20                   | 0.78       | 19.79     | 8.28       | 7.39                   |
|              |       |                       |                      |                  | Bottom  | 2           | 23               | 0.57       | 0.29                   | 144.14     | 116.59    | 111.21     | 296.23                 |
| Heron        |       | 42.8088               | 83.52392             | 42.9             | Surface | 6           | 2                | 4.14       | 0.16                   | 0.16       | 16.58     | 3.76       | 7.05                   |
|              |       |                       |                      |                  | Bottom  | 2           | 10               | 17.04      | 0.17                   | 0.17       | 55.10     | 4.41       | 588.12                 |
| Independence |       | 42.40535              | 83.80415             | 36.0             | Surface | 10          | 2                | 3.65       | 0.13                   | 0.78       | 12.90     | 4.96       | 75.20                  |
|              |       |                       |                      |                  | Bottom  | 6           | 7.1              | 3.21       | 0.11                   | 0.96       | 12.43     | 4.27       | 112.23                 |
| Lobdell      |       | 42.78851              | 83.83338             | 83.0             | Surface | 6           | 2                | 3.34       | 0.17                   | 0.95       | 14.40     | 5.94       | 4.84                   |
|              |       |                       |                      |                  | Bottom  | 2           | 20               | 0.39       | 0.21                   | 60.18      | 54.69     | 44.68      | 116.47                 |
| North        |       | 42.39342              | 84.00815             | 52.2             | Surface | 10          | 2                | 6.56       | 0.14                   | 2.72       | 13.69     | 4.52       | 4.74                   |
|              |       |                       |                      |                  | Bottom  | 4           | 12.5             | 10.17      | 0.10                   | 1.26       | 48.81     | 6.38       | 283.12                 |
| Sand         |       | 42.04443              | 84.1368              | 37.2             | Surface | 6           | 2                | 1.83       | 1.83                   | 1.02       | 9.88      | 3.27       | 3.48                   |
|              |       |                       |                      |                  | Bottom  | 2           | 9                | 3.47       | 3.47                   | 1.15       | 11.66     | 3.74       | 81.48                  |
| Whitmore     |       | 42.43639              | 83.74645             | 61.0             | Surface | 10          | 2                | 3.60       | 0.15                   | 8.67       | 15.93     | 3.69       | 15.09                  |
|              |       |                       |                      |                  | Bottom  | 6           | 14.6             | 1.75       | 0.14                   | 0.04       | 14.07     | 3.61       | 83.02                  |
| Woodland     |       | 42.55198              | 83.77474             | 32.6             | Surface | 6           | 2                | 2.70       | 0.16                   | 0.26       | 14.34     | 5.24       | 7.67                   |
|              |       |                       |                      |                  | Bottom  | 2           | 8                | 30.90      | 0.16                   | 0.00       | 62.56     | 5.72       | 300.30                 |
